# Supplementary material
Source: publisher figshare collection journal article supplement (https://karger.figshare.com/ndownloader/files/35903807)
Supplement: Supplementary file 1 [file 35903807]

Fig. 1 Supplementary Material Identification of a pathogenic variant in *SLC26A2*/*DTDST* in P12 (rMED/DBQD). **a** - Integrated Genomics Viewer (IGV) screenshot. **b** - SS validation - Codon Code Aligner showing the novel frameshift variant (c.2182delG; p.Ala719Glnfs*16) heterozygous.
